# Supplementary material
Source: PubMed Central journal article supplement (PMC3340888)
Supplement: NIHMS335974-supplement-supplement_1.pdf [file NIHMS335974-supplement-supplement_1.pdf]

<Online Supplemental Material>

APPENDIX

Table A1  
*Mean Covariate Balance by Propensity Score Strata and Education (Men) (n = 1,574)*

| Variables                             | Stratum 1<br>[0.0–0.1) |                    | Stratum 2<br>[0.1–0.2) |                    | Stratum 3<br>[0.2–0.4) |                    | Stratum 4<br>[0.4–0.6) |                    | Stratum 5<br>[0.6–1.0) |                    |
|---------------------------------------|------------------------|--------------------|------------------------|--------------------|------------------------|--------------------|------------------------|--------------------|------------------------|--------------------|
|                                       | $E(X) $<br>$d = 0$     | $E(X) $<br>$d = 1$ | $E(X) $<br>$d = 0$     | $E(X) $<br>$d = 1$ | $E(X) $<br>$d = 0$     | $E(X) $<br>$d = 1$ | $E(X) $<br>$d = 0$     | $E(X) $<br>$d = 1$ | $E(X) $<br>$d = 0$     | $E(X) $<br>$d = 1$ |
|                                       | Black                  | .32                | .48                    | .22                | .27                    | .26                | .20                    | .21                | .19                    | .20                |
| Hispanic                              | .14                    | .30                | .13                    | .10                | .11                    | .12                | .13                    | .10                | .15                    | .10                |
| Father's<br>education                 | 9.83                   | 9.35               | 11.22                  | 11.34              | 12.21                  | 12.56              | 13.13                  | 13.37              | 14.91                  | 15.36              |
| Mother's<br>education                 | 10.13                  | 9.04               | 11.18                  | 11.88              | 12.00                  | 12.30              | 12.71                  | 12.60              | 13.85                  | 14.60              |
| Parents'<br>income/\$1000s            | 0.14                   | 0.12               | 0.17                   | 0.15               | 0.19                   | 0.21               | 0.23                   | 0.22               | 0.29                   | 0.36               |
| Both parents<br>Number of<br>siblings | .66                    | .61                | .72                    | .68                | .69                    | .74                | .80                    | .81                | .85                    | .85                |
| Rural residence                       | 4.30                   | 3.91               | 3.19                   | 2.88               | 2.81                   | 2.95               | 2.50                   | 2.53               | 2.39                   | 2.18               |
| Southern<br>residence                 | .24                    | .13                | .25                    | .32                | .23                    | .24                | .10                    | .14                | .22                    | .14                |
| Catholic                              | .36                    | .39                | .35                    | .44                | .32                    | .31                | .34                    | .25                | .30                    | .37                |
| Jewish                                | .29                    | .35                | .35                    | .29                | .33                    | .38                | .38                    | .36                | .33                    | .27                |
| Cognitive ability                     | 0.00                   | 0.00               | 0.00                   | 0.00               | 0.01                   | 0.00               | 0.01                   | 0.00               | 0.02                   | 0.10               |
| College<br>preparatory                | -0.26                  | 0.06               | 0.29                   | 0.31               | 0.67                   | 0.67               | 0.99                   | 0.99               | 1.29                   | 1.40               |
| Parents'<br>encouragement             | .09                    | .07                | .24                    | .15                | .44                    | .47                | .69                    | .82                | .95                    | .83                |
| Friends' plans                        | .47                    | .61                | .70                    | .68                | .84                    | .84                | .97                    | .95                | 1.00                   | .97                |
| Propensity score                      | 12.70                  | 13.26              | 14.11                  | 14.24              | 14.70                  | 14.69              | 15.49                  | 15.57              | 16.26                  | 16.26              |
| $n$                                   | .04                    | .06                | .14                    | .15                | .29                    | .30                | .49                    | .49                | .68                    | .73                |
|                                       | 511                    | 23                 | 232                    | 41                 | 272                    | 103                | 115                    | 134                | 46                     | 97                 |

*Note.*  $E(X) | d = 0$  indicates the mean of  $X$  for men who did not attend college by age 19 and  $E(X) | d = 1$  indicates the mean of  $X$  for men who attended college by age 19.

Table A2  
Mean Covariate Balance by Propensity Score Strata and Education (Women) (n = 1,634)

| Variables               | Stratum 1<br>[0.0-0.2) |                | Stratum 2<br>[0.2-0.3) |                | Stratum 3<br>[0.3-0.4) |                | Stratum 4<br>[0.4-0.6) |                | Stratum 5<br>[0.6-1.0) |                |
|-------------------------|------------------------|----------------|------------------------|----------------|------------------------|----------------|------------------------|----------------|------------------------|----------------|
|                         | $E(X)   d = 0$         | $E(X)   d = 1$ | $E(X)   d = 0$         | $E(X)   d = 1$ | $E(X)   d = 0$         | $E(X)   d = 1$ | $E(X)   d = 0$         | $E(X)   d = 1$ | $E(X)   d = 0$         | $E(X)   d = 1$ |
| Black                   | .30                    | .37            | .29                    | .31            | .31                    | .23            | .20                    | .26            | .26                    | .15            |
| Hispanic                | .17                    | .28            | .14                    | .16            | .11                    | .15            | .21                    | .09            | .20                    | .07            |
| Father's education      | 9.48                   | 9.82           | 11.29                  | 10.29          | 12.09                  | 12.63          | 12.59                  | 13.25          | 14.33                  | 15.11          |
| Mother's education      | 9.72                   | 9.96           | 11.31                  | 11.31          | 11.93                  | 11.87          | 12.36                  | 12.85          | 13.48                  | 14.05          |
| Parents' income/\$1000s | 0.15                   | 0.15           | 0.18                   | 0.16           | 0.18                   | 0.19           | 0.21                   | 0.22           | 0.27                   | 0.30           |
| Both parents            | .65                    | .59            | .71                    | .65            | .62                    | .72            | .75                    | .76            | .77                    | .84            |
| Number of siblings      | 4.39                   | 4.28           | 3.35                   | 3.43           | 2.96                   | 2.77           | 3.11                   | 2.75           | 2.29                   | 2.18           |
| Rural residence         | .22                    | .24            | .22                    | .24            | .21                    | .12            | .19                    | .22            | .18                    | .18            |
| Southern residence      | .36                    | .44            | .36                    | .35            | .36                    | .40            | .40                    | .41            | .44                    | .30            |
| Catholic                | .32                    | .37            | .36                    | .44            | .31                    | .35            | .46                    | .33            | .44                    | .38            |
| Jewish                  | .00                    | .00            | .00                    | .00            | .00                    | .00            | .00                    | .00            | .03                    | .11            |
| Cognitive ability       | -0.34                  | -0.12          | 0.12                   | 0.11           | 0.30                   | 0.26           | 0.58                   | 0.61           | 0.99                   | 0.98           |
| College preparatory     | .07                    | .11            | .27                    | .30            | .43                    | .48            | .63                    | .62            | .91                    | .89            |
| Parents' encouragement  | .59                    | .63            | .79                    | .90            | .85                    | .83            | .92                    | .91            | .95                    | .95            |
| Friends' plans          | 12.91                  | 13.46          | 14.28                  | 14.37          | 14.94                  | 14.81          | 15.57                  | 15.42          | 16.15                  | 16.25          |
| Propensity score        | .10                    | .14            | .25                    | .25            | .35                    | .35            | .48                    | .50            | .68                    | .72            |
| <i>n</i>                | 566                    | 68             | 225                    | 68             | 137                    | 75             | 140                    | 159            | 66                     | 130            |

Note.  $E(X) | d = 0$  indicates the mean of  $X$  for women who did not attend college by age 19 and  $E(X) | d = 1$  indicates the mean of  $X$  for women who attended college by age 19.
